# Supplementary material for: Patients’ and Nurses’ Perceptions of Diabetes Self-Management in Oman: A Qualitative Study
Source: Int J Environ Res Public Health. 2022 Jun 6;19(11):6929. doi: 10.3390/ijerph19116929 (PMC9180150; doi:10.3390/ijerph19116929)
Supplement: Supplementary file 1 [file ijerph-19-06929-s001.zip › ijerph-1730944-Table S1.pdf]

**Supplementary Table for Demographic**

| <b>Patient<br/>Participants</b> | <b>Age</b> | <b>Gender</b> | <b>Diabetes<br/>Duration</b> | <b>HbA1c</b> | <b>Nurse<br/>Participants</b> | <b>Age</b> | <b>Gender</b> | <b>Years of<br/>Experiences</b> | <b>Education<br/>Level</b> |
|---------------------------------|------------|---------------|------------------------------|--------------|-------------------------------|------------|---------------|---------------------------------|----------------------------|
| P1                              | 37         | Female        | 6                            | 7.5          | Nur1                          | 49         | Male          | 24                              | Diploma                    |
| P2                              | 60         | Female        | 21                           | 5.5          | Nur2                          | 39         | Female        | 20                              | Diploma                    |
| P3                              | 46         | Male          | 6                            | 6.7          | Nur3                          | 35         | Male          | 15                              | Bachelor                   |
| P4                              | 48         | Male          | 8                            | 8.9          | Nur4                          | 48         | Female        | 24                              | Diploma                    |
| P5                              | 25         | Male          | 2                            | 10.2         | Nur5                          | 41         | Female        | 21                              | Diploma                    |
| P6                              | 50         | Male          | 8                            | 11.0         | Nur6                          | 39         | Female        | 20                              | Diploma                    |
| P7                              | 59         | Male          | 3                            | 8.0          | Nur7                          | 30         | Female        | 9                               | Diploma                    |
| P8                              | 35         | Male          | 16                           | 11.6         | Nur8                          | 34         | Female        | 13                              | Diploma                    |
| P9                              | 35         | Female        | 3                            | 5.5          | Nur9                          | 39         | Female        | 18                              | Diploma                    |
| P10                             | 42         | Female        | 12                           | 7.7          | Nur10                         | 28         | Female        | 7                               | Diploma                    |
| P11                             | 50         | Female        | 23                           | 7.7          | Nur11                         | 29         | Female        | 8                               | Diploma                    |
| P12                             | 32         | Female        | 12                           | 9.4          | Nur12                         | 29         | Female        | 8                               | Diploma                    |
| P13                             | 33         | Male          | 3                            | 6.1          | Nur13                         | 38         | Female        | 16                              | Diploma                    |
| P14                             | 33         | Female        | 15                           | 13.4         | Nur14                         | 38         | Female        | 19                              | Diploma                    |
| P15                             | 38         | Male          | 1                            | 6.3          | Nur15                         | 38         | Female        | 17                              | Diploma                    |
| P16                             | 45         | Female        | 4                            | 13.2         | Nur16                         | 38         | Female        | 17                              | Diploma                    |
| P17                             | 52         | Male          | 21                           | 9.0          | Nur17                         | 36         | Female        | 15                              | Diploma                    |
| P18                             | 43         | Male          | 10                           | 7.5          | Nur18                         | 39         | Female        | 16                              | Bachelor                   |
| P19                             | 48         | Female        | 19                           | 8.7          | Nur19                         | 34         | Female        | 13                              | Bachelor                   |
| P20                             | 34         | Female        | 8                            | 7.8          | Nur20                         | 40         | Female        | 20                              | Diploma                    |
| P21                             | 40         | Male          | 11                           | 8.2          | Nur21                         | 36         | Female        | 16                              | Post-graduate              |
| P22                             | 28         | Male          | 7                            | 7.8          | -                             | -          | -             | -                               | -                          |
| P23                             | 35         | Male          | 8                            | 8.7          | -                             | -          | -             | -                               | -                          |
| P24                             | 41         | Female        | 10                           | 10.9         | -                             | -          | -             | -                               | -                          |
